# Supplementary material for: A marine sponge-derived lectin reveals hidden pathway for thrombopoietin receptor activation
Source: Springer Nature journal article supplement (doi:10.1038/s41467-022-34921-2), 2022-11-25
Supplement: MOESM1 [file 41467_2022_34921_MOESM1_ESM-1.pdf]

## Supplementary Information

### A marine sponge-derived lectin reveals hidden pathway for thrombopoietin receptor activation

Hiromi Watari<sup>1</sup>†, Hiromu Kageyama<sup>2</sup>†, Nami Masubuchi<sup>3</sup>, Hiroya Nakajima<sup>1</sup>, Kako Onodera<sup>2</sup>, Pamela J. Focia<sup>4</sup>, Takumi Oshiro<sup>5</sup>, Takashi Matsui<sup>5,6</sup>, Yoshio Kodera<sup>5,6</sup>, Tomohisa Ogawa<sup>2</sup>, Takeshi Yokoyama<sup>2</sup>, Makoto Hirayama<sup>7</sup>, Kanji Hori<sup>7</sup>, Douglas M. Freymann<sup>4</sup>, Misa Imai<sup>3</sup>, Norio Komatsu<sup>3,8,9</sup>, Marito Araki<sup>3\*</sup>, Yoshikazu Tanaka<sup>2\*</sup>,  
Ryuichi Sakai<sup>1\*</sup>

\*Corresponding authors. Email: Ryuichi Sakai <[ryu.sakai@fish.hokudai.ac.jp](mailto:ryu.sakai@fish.hokudai.ac.jp)>; Marito Araki <[m-araki@juntendo.ac.jp](mailto:m-araki@juntendo.ac.jp)>; Yoshikazu TANAKA <[yoshikazu.tanaka@tohoku.ac.jp](mailto:yoshikazu.tanaka@tohoku.ac.jp)>

†These authors contributed equally to this work.

<sup>1</sup>*Graduate School of Fisheries Sciences, Hokkaido University; Hakodate, Japan.*

<sup>2</sup>*Graduate School of Life Sciences, Tohoku University; Sendai, Japan.*

<sup>3</sup>*Laboratory for the development of therapies against MPN, Juntendo University Graduate School of Medicine; Tokyo, Japan.*

<sup>4</sup>*Department of Biochemistry & Molecular Genetics, Feinberg School of Medicine, Northwestern University; Chicago, USA.*

<sup>5</sup>*Department of Physics, School of Science, Kitasato University; Sagamihara, Japan.*

<sup>6</sup>*Center for Disease Proteomics, School of Science, Kitasato University; Sagamihara, Japan.*

<sup>7</sup>*Graduate School of Integrated Sciences for Life, Hiroshima University; Higashi-Hiroshima, Japan*

<sup>8</sup>*Department of Advanced Hematology, Juntendo University Graduate School of Medicine; Tokyo, Japan.*

<sup>9</sup>*Department of Hematology, Juntendo University Graduate School of Medicine; Tokyo, Japan.*

## Supplementary Tables

**Supplementary Table 1. Affinities and thermodynamic parameters of binding <sup>a</sup>**

| protein       | ligand  | 5mM<br>CaCl <sub>2</sub> | K <sub>D</sub>    | ΔH                                     | ΔS                                                    | ΔG                                     | K <sub>A</sub>                                    | K <sub>D</sub> in the<br>previous<br>report |
|---------------|---------|--------------------------|-------------------|----------------------------------------|-------------------------------------------------------|----------------------------------------|---------------------------------------------------|---------------------------------------------|
|               |         |                          | (μM) <sup>b</sup> | (kcal mol <sup>-1</sup> ) <sup>c</sup> | (cal mol <sup>-1</sup> K <sup>-1</sup> ) <sup>c</sup> | (kcal mol <sup>-1</sup> ) <sup>c</sup> | (M <sup>-1</sup> × 10 <sup>4</sup> ) <sup>c</sup> | (μM)                                        |
| rThC          | fucose  | +                        | 4.72 ±<br>0.25    | -8.14                                  | -2.94                                                 | -7.26                                  | 21.2 ±<br>1.12                                    |                                             |
|               |         | -                        | NB                | NB                                     | NB                                                    | NB                                     |                                                   |                                             |
|               | mannose | +                        | 66.2 ±<br>15.3    | -0.76                                  | 16.6                                                  | -5.71                                  | 1.51 ±<br>0.35                                    |                                             |
|               |         | -                        | NB                | NB                                     | NB                                                    | NB                                     |                                                   |                                             |
| Q25K          | fucose  | +                        | NB                | NB                                     | NB                                                    | NB                                     |                                                   |                                             |
| G132          | fucose  | +                        | NB                | NB                                     | NB                                                    | NB                                     |                                                   |                                             |
| BC2LC-<br>CTD | fucose  | +                        | NB                | NB                                     | NB                                                    | NB                                     |                                                   |                                             |
|               | mannose | +                        | 17.7 ±<br>0.32    | -10.0                                  | -11.9                                                 | -6.45                                  | 5.65 ±<br>0.42                                    | 37.4 <sup>(1)</sup>                         |
| PAILL         | fucose  | +                        | 2.78 ±<br>0.30    | -6.46                                  | 3.75                                                  | -7.58                                  | 35.9 ±<br>3.90                                    | 2.9 ± 0.03 <sup>(2)</sup>                   |
|               | mannose | +                        | 78.7 ±<br>23.6    | -9.46                                  | -12.9                                                 | -5.62                                  | 1.27 ±<br>0.38                                    | (Me-α-Man:<br>71 ± 3) <sup>(2)</sup>        |

Not bound is indicated as "NB".

<sup>a</sup> These parameters were determined in 20 mM HEPES-NaOH (pH 8.0), 200 mM NaCl, at 25 °C

<sup>b</sup> K<sub>D</sub> = 1/K<sub>A</sub>

<sup>c</sup> -RT ln K<sub>A</sub> = ΔH -TΔS = ΔG

**Supplementary Table 2. Data collection and refinement statistics**

|                                                      |                                    | Native ThC                 | SeMet Substituted rThC                                | rThC in complex with Ca <sup>2+</sup> and fucose      | rThC in complex with Ca <sup>2+</sup> and mannose     | rThC Q25K in complex with Ca <sup>2+</sup>            |
|------------------------------------------------------|------------------------------------|----------------------------|-------------------------------------------------------|-------------------------------------------------------|-------------------------------------------------------|-------------------------------------------------------|
| PDB ID                                               |                                    | 7F9F                       | 7F9I                                                  | 7F9G                                                  | 7FBL                                                  | 7F9J                                                  |
| Beamline                                             |                                    | APS BL 21-ID-F             | Photon Factory BL-1A                                  | Photon Factory NE3A                                   | Photon Factory NE3A                                   | Photon Factory NE3A                                   |
| Data collection                                      |                                    |                            |                                                       |                                                       |                                                       |                                                       |
| Space group                                          |                                    | <i>P</i> 2 <sub>1</sub>    | <i>P</i> 2 <sub>1</sub> 2 <sub>1</sub> 2 <sub>1</sub> | <i>P</i> 2 <sub>1</sub> 2 <sub>1</sub> 2 <sub>1</sub> | <i>P</i> 2 <sub>1</sub> 2 <sub>1</sub> 2 <sub>1</sub> | <i>P</i> 2 <sub>1</sub> 2 <sub>1</sub> 2 <sub>1</sub> |
| Cell dimensions                                      |                                    |                            |                                                       |                                                       |                                                       |                                                       |
|                                                      | <i>a</i> , <i>b</i> , <i>c</i> (Å) | 42.46, 92.44, 58.54        | 41.80, 45.00, 109.91                                  | 41.52, 44.72, 108.58                                  | 41.57, 44.98, 109.26                                  | 41.66, 44.88, 109.56                                  |
|                                                      | $\alpha$ , $\beta$ , $\gamma$ (°)  | 90, 102.8, 90              | 90, 90, 90                                            | 90, 90, 90                                            | 90, 90, 90                                            | 90, 90, 90                                            |
| Resolution (Å) <sup>a</sup>                          |                                    | 30.47 - 1.41 (1.43 - 1.41) | 41.64 - 1.40 (1.49 - 1.40)                            | 41.35 - 1.33 (1.41 - 1.33)                            | 41.59 - 1.42 (1.50 - 1.42)                            | 38.94 - 1.10 (1.17 - 1.10)                            |
| <i>R</i> <sub>sym</sub> (%) <sup>a</sup>             |                                    | 9.9 (64.2)                 | 9.6 (66.3)                                            | 5.7 (37.7)                                            | 7.7 (50.3)                                            | 5.3 (65.8)                                            |
| $\langle I/\sigma(I) \rangle$ <sup>a</sup>           |                                    | 25.15 (2.17)               | 11.28 (2.14)                                          | 26.05 (5.64)                                          | 22.27 (4.64)                                          | 21.83 (2.70)                                          |
| Completeness (%) <sup>a</sup>                        |                                    | 99.9 (99.7)                | 99.9 (99.6)                                           | 99.8 (98.7)                                           | 99.7 (98.7)                                           | 99.4 (96.6)                                           |
| Redundancy <sup>a</sup>                              |                                    | 5.7 (4.4)                  | 7.04 (7.07)                                           | 9.60 (9.48)                                           | 9.51 (9.31)                                           | 9.19 (7.57)                                           |
| Wilson B-factor (Å <sup>2</sup> )                    |                                    | 10.3                       | 13.6                                                  | 9.1                                                   | 9.6                                                   | 10.9                                                  |
| Refinement                                           |                                    |                            |                                                       |                                                       |                                                       |                                                       |
| No. of reflections used in refinement                |                                    | 81704                      | 41580                                                 | 47088                                                 | 39532                                                 | 83639                                                 |
| No. of reflections used for <i>R</i> <sub>free</sub> |                                    | 1950                       | 2080                                                  | 1642                                                  | 1369                                                  | 2900                                                  |
| <i>R</i> <sub>work</sub> / <i>R</i> <sub>free</sub>  |                                    | 0.169 / 0.194              | 0.175 / 0.200                                         | 0.155 / 0.168                                         | 0.162 / 0.182                                         | 0.185 / 0.197                                         |
| No. atoms                                            |                                    |                            |                                                       |                                                       |                                                       |                                                       |
|                                                      | Protein                            | 3854                       | 1940                                                  | 2009                                                  | 2017                                                  | 2023                                                  |
|                                                      | Ligand                             | 2                          | 0                                                     | 26                                                    | 27                                                    | 2                                                     |
|                                                      | Water                              | 799                        | 247                                                   | 323                                                   | 317                                                   | 332                                                   |
| R.m.s deviations                                     |                                    |                            |                                                       |                                                       |                                                       |                                                       |
|                                                      | Bond lengths (Å)                   | 0.005                      | 0.005                                                 | 0.005                                                 | 0.007                                                 | 0.005                                                 |
|                                                      | Bond angles (°)                    | 0.89                       | 0.89                                                  | 0.93                                                  | 0.97                                                  | 0.93                                                  |
| Average B-factor (Å <sup>2</sup> )                   |                                    | 15.4                       | 17.0                                                  | 11.6                                                  | 11.1                                                  | 14.3                                                  |
|                                                      | Protein                            | 13.5                       | 16.1                                                  | 10.0                                                  | 9.7                                                   | 12.8                                                  |
|                                                      | ligand                             | 7.9                        | -                                                     | 14.7                                                  | 7.4                                                   | 18.1                                                  |
|                                                      | Water                              | 24.9                       | 24.3                                                  | 21.6                                                  | 20.4                                                  | 23.2                                                  |
| Ramachandran plot                                    |                                    |                            |                                                       |                                                       |                                                       |                                                       |
|                                                      | Favored (%)                        | 97.67                      | 97.67                                                 | 97.67                                                 | 97.28                                                 | 98.05                                                 |
|                                                      | Allowed (%)                        | 2.33                       | 2.33                                                  | 2.33                                                  | 2.33                                                  | 1.95                                                  |
|                                                      | Disallowed (%)                     | 0                          | 0                                                     | 0                                                     | 0.39                                                  | 0                                                     |

<sup>a</sup> The values in parentheses refer to data in the highest resolution shell.

**Supplementary Table 3. Primers used for the construction of MPL and rThC derivatives**

| Primer Name   | Primer Sequence                            |
|---------------|--------------------------------------------|
| MPL N117Q Fw  | 5'-GTGTTCCCTACAGCAGACTCGGACTCAGCGAGTCC-3'  |
| MPL N117Q Rev | 5'-CGAGTCTGCTGTAGGAACACATTCTTCACCCAG-3'    |
| MPL N178Q Fw  | 5'-GATCCCAAGCAGTCCACTGGTCCCACGGTCATACAG-3' |
| MPL N178Q Rev | 5'-CCAGTGGACTGCTTGGGATCTCTGGGGCCATAGC-3'   |
| MPL N298Q Fw  | 5'-GACCTGAAGCAGGTTACCTGTCAATGGCAGCAAC-3'   |
| MPL N298Q Rev | 5'-CAGGTAACCTGCTTCAGGTCCAAGGTAAAGCATTGC-3' |
| MPL N358Q Fw  | 5'-CAAGTCACGACAGGACAGCATTATTACATCCTTG-3'   |
| MPL N358Q Rev | 5'-GCTGTCCTGTGCTGACTTGAAGTGGCAGCGAGAG-3'   |
| rThC Fw       | 5'-TCCGTGCAAAGCTCGCGCAATGAGAGC-3'          |
| rThC Rev      | 5'-CGAGCTTTGCACGGACGCATTCAGGCT-3'          |
| rThC G132 Fw  | 5'-TTCGCGGTGGCTAACTCGAGCACC-3'             |
| rThC G132 Rev | 5'-GCTCGAGTTAGCCACCGCGAACTAAC-3'           |

## Supplementary Notes

### Supplementary Note 1

Amino acid sequence determination.

We first identified a preliminary 131-amino acid sequence of native ThC (nThC) isolated from the sponge using mass spectrometry and Edman degradation after peptic digestion (Supplementary Figure 3a). A draft ThC based on this sequence assigned lysine (K) to the 25<sup>th</sup> amino acid residue. However, unlike nThC, the draft ThC failed to promote the proliferation of MPL activation-dependent Ba/F3-HuMpl, even at high concentrations (Supplementary Figure 3b). This lack of activity showed that at least one amino acid residue in the draft-ThC sequence was assigned incorrectly. Therefore, we performed X-ray crystal structure analysis of nThC and found that the 25<sup>th</sup> amino acid residue originally assigned as K in the draft-ThC sequence was glutamic acid (E) or glutamine (Q) (Supplementary Figure 3c). An LC-MS/MS experiment unambiguously identified this residue as Q (Supplementary Figures 4 - 6), and the complete amino acid sequence of ThC was determined.

### Supplementary Note 2

A structure comparison between apo and sugar bound lectins.

In the ITC experiment, unfavorable entropic change was observed in rThC-fucose binding and PA-IIL-mannose binding, while PA-IIL-fucose binding was favorable in both enthalpy and entropy terms (Supplementary Table 1). In the reviewing process of this manuscript, one of the reviewers suggested some large conformational changes such as induced fit that might account for the difference in the thermodynamic differences. We thus tested this idea by comparing the crystal structures of apo-rThC, rThC-fucose, rThC-mannose, and apo- PA-IIL, PA-IIL-fucose, and PA-IIL-mannose. The RMSDs for the apo- and sugar-bound structures are very low in all cases (Supplementary Table 4), suggesting that there are no major global structural changes interpretable as induced fit which is typically taken into account when RMSD is greater than  $\sim 2 \text{ \AA}$ . Some local structure changes, on the other hand, in both rThC and PA-IIL were observed, but only at residues around the sugar binding site upon fucose/mannose binding. However, no clear correlation between mannose and fucose and the structural change were found (Supplementary Table 4); that is, in the case of rThC, both fucose/mannose showed conformational changes compared with the apo form, whereas in the case of PA-IIL, mannose-bound forms showed only slight difference from the

apo-state, but the fucose-bound form appeared to have conformational change. However, no clear correlation between the conformational change and entropy term was found (Supplementary Table 4).

This result may suggest that it is difficult to interpret each interaction solely from the numerical thermodynamic properties obtained in each experiment. In fact, there is a report<sup>2</sup> that investigated in detail the correlation between sugar-binding activity and conformation of sugar-binding proteins (PA-IIL and CV-IIL) that are very similar to rThC. Sabin *et al* have also reported in binding between PA-IIL and fucose, slight gain in entropy was observed, while that with methyl- $\alpha$ -fucose, unfavorable entropy was evident.<sup>3</sup> In both cases, no obvious correlation between the structure and thermodynamic profiles were found and authors of both papers concluded that it is difficult to corroborate mechanistic basis at this point.

**Supplementary Table 4.** Conformational changes and entropy terms of lectins upon sugar binding.

|        |                     | Fuc    | Man    |
|--------|---------------------|--------|--------|
| rThC   | global <sup>a</sup> | 0.21   | 0.17   |
|        | local <sup>b</sup>  | large  | large  |
|        | $\Delta S$          | -2.94  | 16.6   |
| PA-IIL | global <sup>a</sup> | 0.39   | 0.21   |
|        | local <sup>b</sup>  | larger | slight |
|        | $\Delta S$          | 3.75   | -12.9  |

- a. RMSD (Å), rThC: apo vs fucose: 218 C $\alpha$  atoms, apo vs mannose: 214 C $\alpha$  atoms; PA-IIL (when comparing dimer):apo vs fucose: 215 C $\alpha$  atoms; apo vs mannose: 200 C $\alpha$  atoms
- b. Judged from conformational difference between apo and sugar-bound state around the sugar binding sites in Supplementary Figure 1.

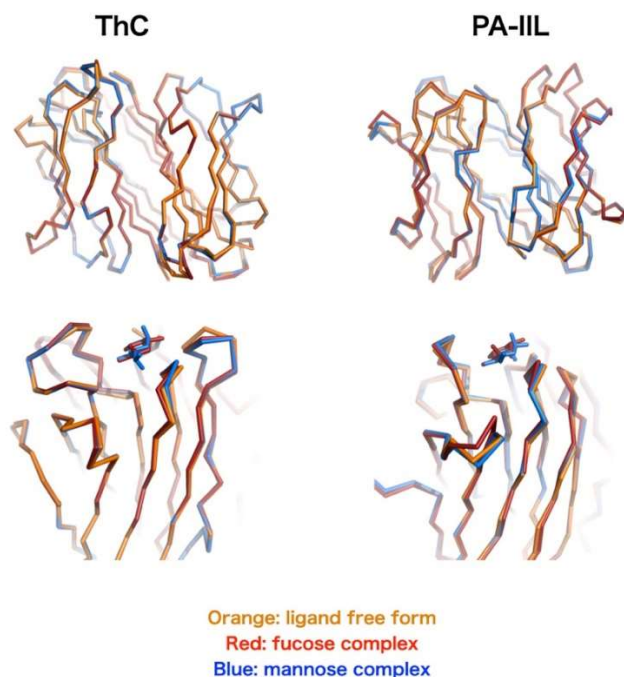

**Supplementary Figure 1.** Superimposition of rThC and PA-IIL ligand unbound (orange), fucose-bound (red), and mannose-bound (blue) states. The upper panel shows the global structure and the lower panel shows the local structure around the sugar binding site.

### Supplementary Note 3

Crystal structure determination.

In the crystal structure of rThC–fucose, the electron density of fucose at one of the carbohydrate-binding sites was more obscure than that at the other (the average B-factor of all atoms in fucose was 8.4 and 22.6, respectively; Supplementary Figure 2).

Moreover, mannose clearly bound to one sugar-binding site but not to the other. These results suggested that the binding of sugar to the two sites in the crystal milieu is not equivalent, likely due to neighboring effect in the process of crystal packing. However, the ITC thermogram showing a sigmoidal curve with a typical two-state transition indicated that the stoichiometry of ThC to sugar is 1:1 and two sugar-binding sites in the ThC dimer were occupied in solution. Therefore, the structure of the site with clear electron density was used in this manuscript for discussion of the interaction between sugar and ThC.

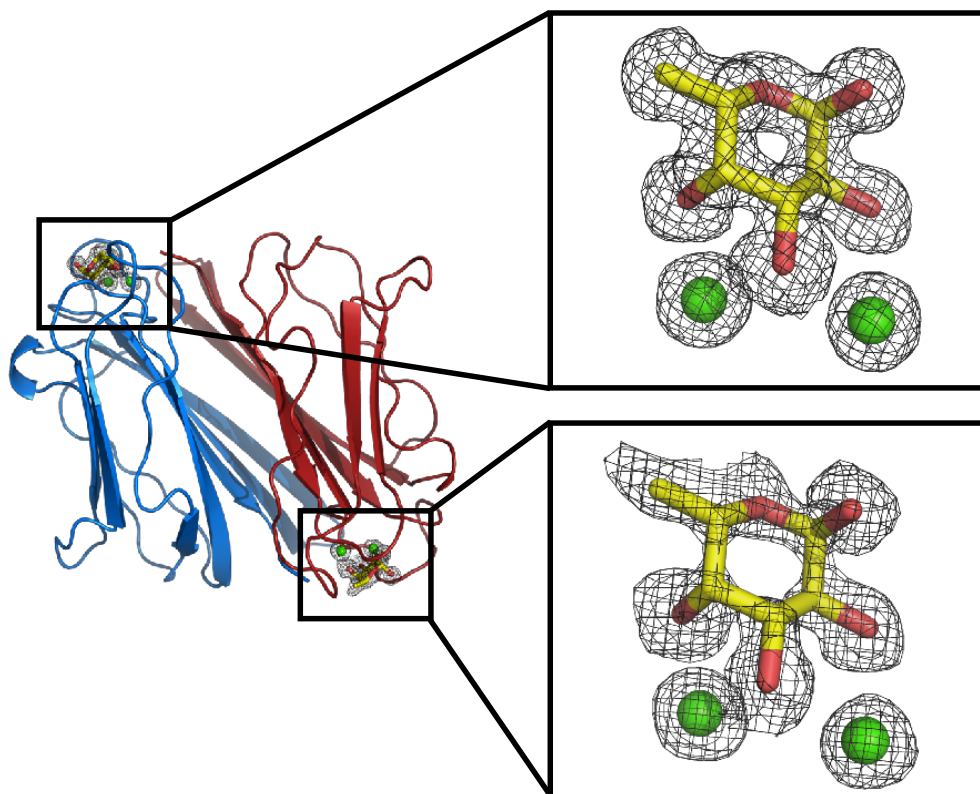

**Supplementary Figure 2.** Fo-Fc map (contoured at 1.3  $\sigma$ ) of the fucose (ball-and-stick model, yellow: carbon, red: oxygen) and Ca<sup>2+</sup> ions (green ball) bound in the two sugar binding sites of rThC. In the case of ThC-fucose, the electron density at one of the carbohydrate binding sites was obscurer than the other (average of B-factor of all atoms in the fucose was 8.4 and 22.6, respectively).



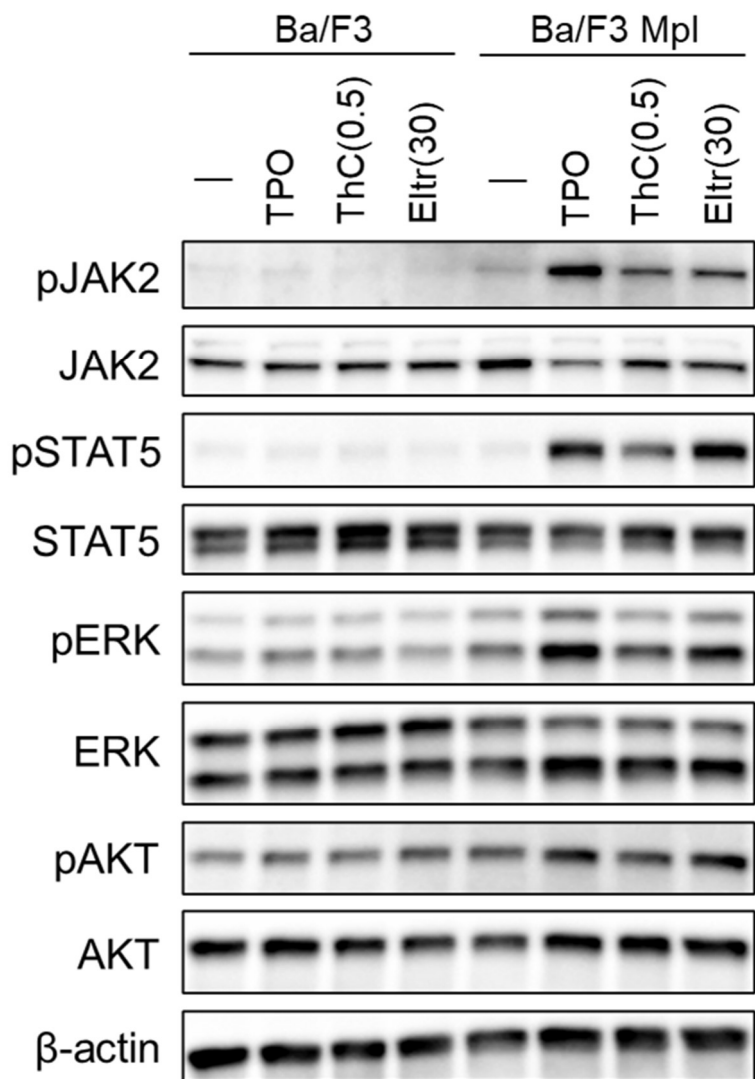

**Supplementary Figure 4. Sequence determination of ThC continued**  
 Immunoblot analysis at 24h after activation of Ba/F3 and Ba/F3-HuMpl cells upon steady-state activation by TPO and rThC. Three independent experiments were carried out.

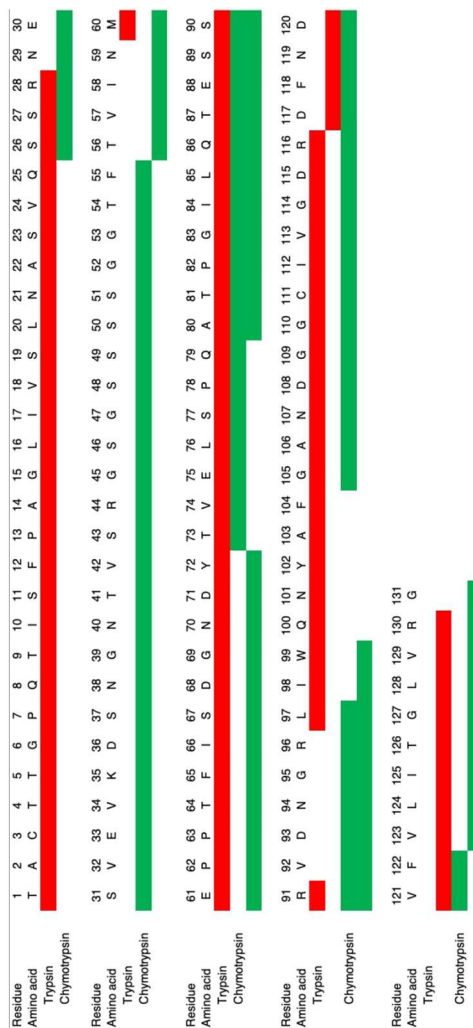

### Supplementary Figure 5. Sequence determination of ThC continued

The amino acid sequence of nThC was re-examined by using ultrahigh resolution LC-MS/MS *de novo* sequencing. Peptide fragments, of which amino acid sequence were determined, generated by trypsin or chymotrypsin and shown red and green, respectively. Cys residue was treated with iodoacetamide to prevent from S-S bond reformation thus Cys residue was searched as Cys carbamidomethylation.

# TAcTTGPQTISFPAGLIVSLNASVQSSR (res 1-28)

RT: 0.00 - 20.00

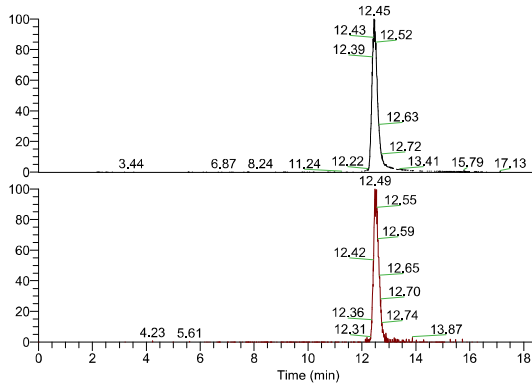

NL: 1.87E7  
m/z=  
716.61375-716.62809+  
955.14925-955.16835 F: FTMS +  
p ESI Full ms  
[350.0000-1200.0000] MS  
cAosr014\_001\_tNThc\_4uL\_T20\_A

recombinant

NL: 2.29E5  
m/z=  
716.61375-716.62809+  
955.14925-955.16835 F: FTMS +  
p ESI Full ms  
[350.0000-1200.0000] MS  
cAosr016\_001\_tThC\_0o7ugeq\_4u  
L\_T20\_A

Native

charge 4 (theoretical m/z=716.62092)

recombinant m/z=716.62140, RT=12.62 Δppm = 0.63 (PD)

Native

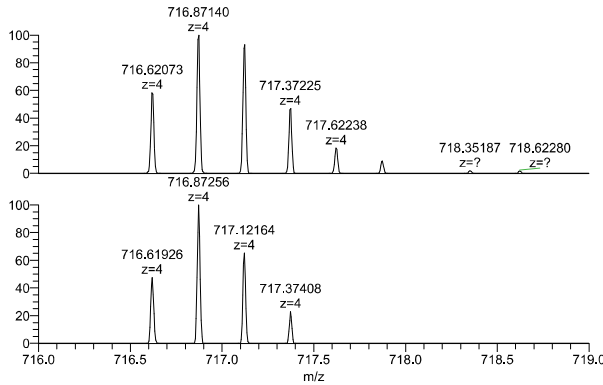

NL: 1.93E6  
cAosr014\_001\_tNThc\_4uL\_T  
20\_A#2653 RT: 12.44 AV:  
1 T: FTMS + p ESI Full lock  
ms [350.0000-1200.0000]

recombinant

NL: 2.52E4  
cAosr016\_001\_tThC\_0o7ugeq  
q\_4uL\_T20\_A#2644 RT:  
12.45 AV: 1 T: FTMS + p  
ESI Full lock ms  
[350.0000-1200.0000]

Native

charge 3 (theoretical m/z=955.15880)

recombinant

Native m/z=955.15845, RT=12.38, Δppm=-0.41 (PD)

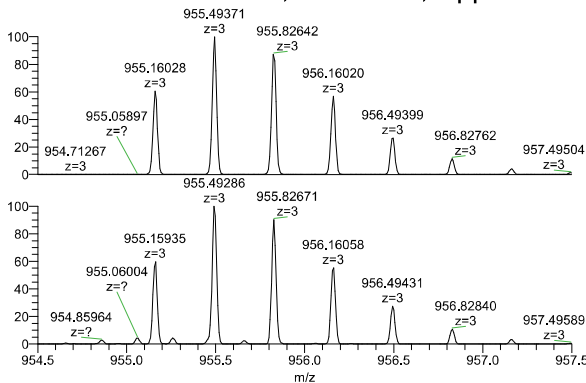

NL: 7.00E6  
cAosr014\_001\_tNThc\_4uL\_T20  
\_A#2567-2761 RT:  
12.01-13.00 AV: 146 T: FTMS  
+ p ESI Full lock ms  
[350.0000-1200.0000]

recombinant

NL: 6.89E4  
cAosr016\_001\_tThC\_0o7ugeq\_  
4uL\_T20\_A#2548-2753 RT:  
12.00-12.99 AV: 148 T: FTMS  
+ p ESI Full lock ms  
[350.0000-1200.0000]

Native

# SSRNESVEVKDSNGNTVSRGSGSSSSGGTF (res 26-55)

RT: 0.00 - 20.00

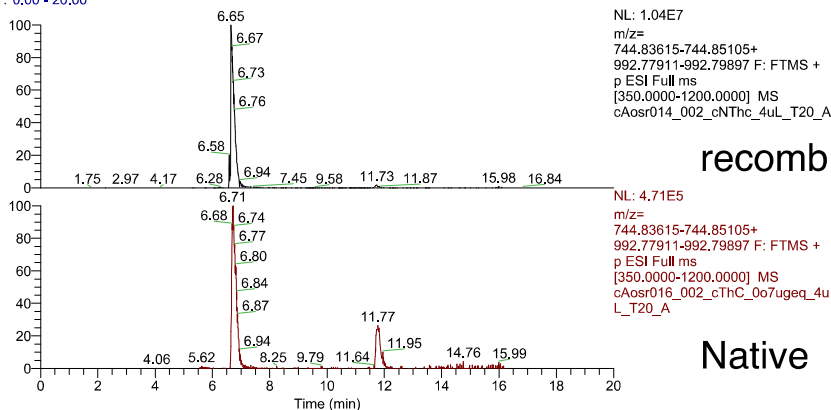

charge 3 (theoretical m/z=992.78904)

recombinant m/z=992.78967, RT=6.59,  $\Delta$ ppm=0.60 (PD)

Native

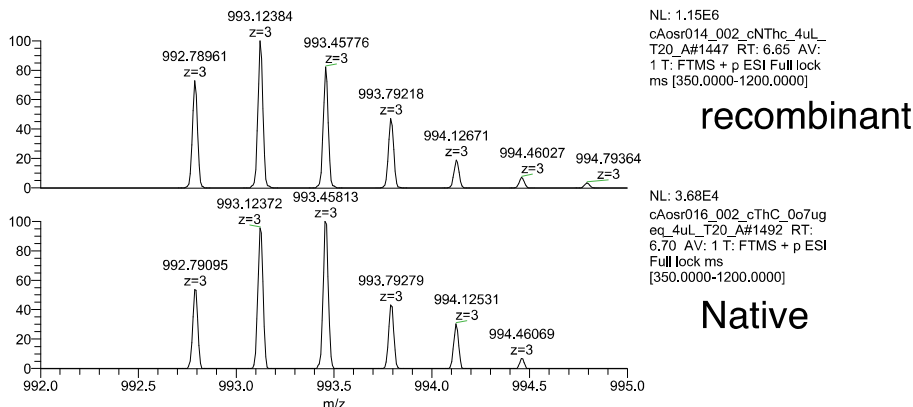

charge 4 (theoretical m/z=744.84360)

recombinant m/z=744.8442, RT=6.57,  $\Delta$ ppm=0.8 (PEAKS)

Native m/z=744.8444, RT=6.71,  $\Delta$ ppm=1.0 (PEAKS)

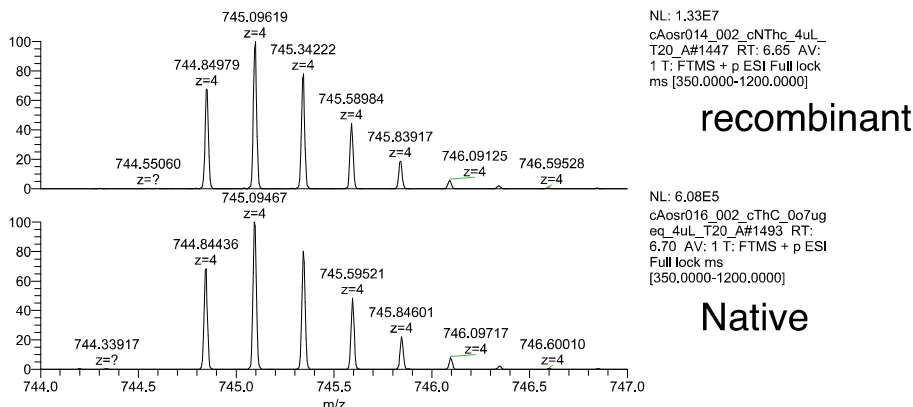

# TVINMEPPTFISDGNDY (res 56-72)

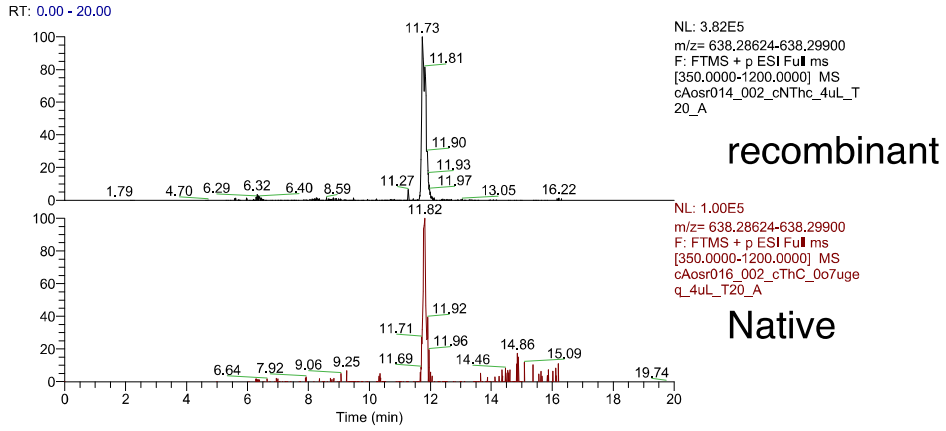

charge 3 (theoretical m/z=638.29262)  
 recombinant m/z=638.2927, RT=11.71, Δppm=0.2 (PEAKS)  
 Native m/z=638.2935, RT=11.80, Δppm=1.4 (PEAKS)

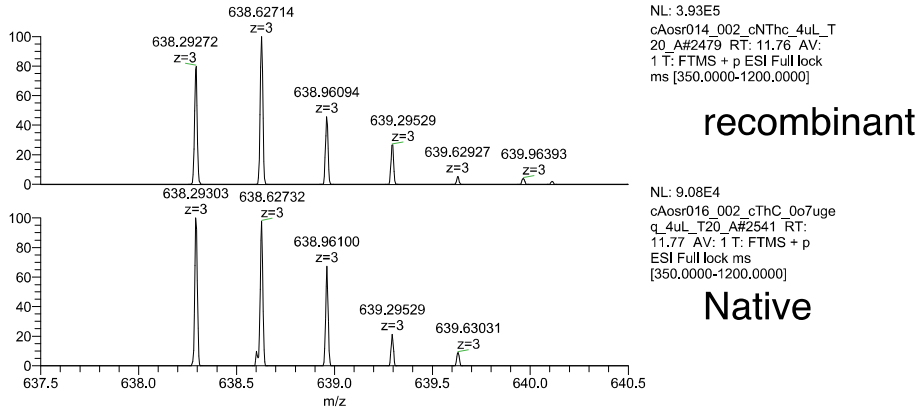

# MEPPTFISDGNDYTVELSPQATPGILQTESSR (res 60-91)

RT: 0.00 - 20.00

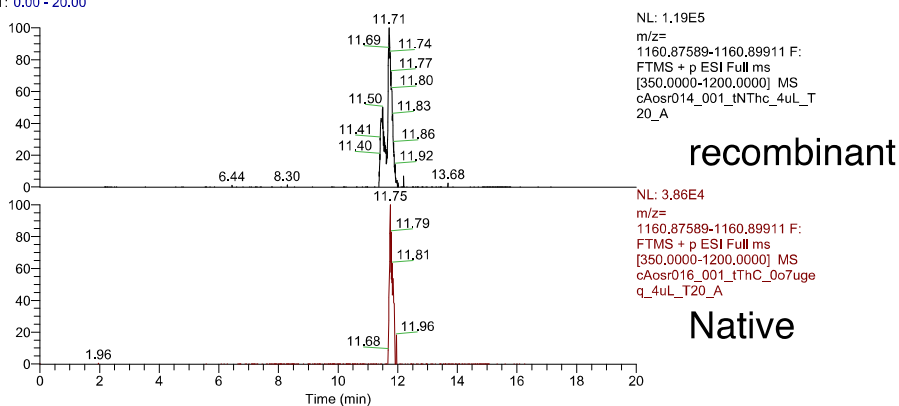

charge 3 (theoretical m/z=1160.88736)

recombinant

Native m/z=1160.8875, RT=11.75,  $\Delta$ ppm=0.1 (PEAKS)

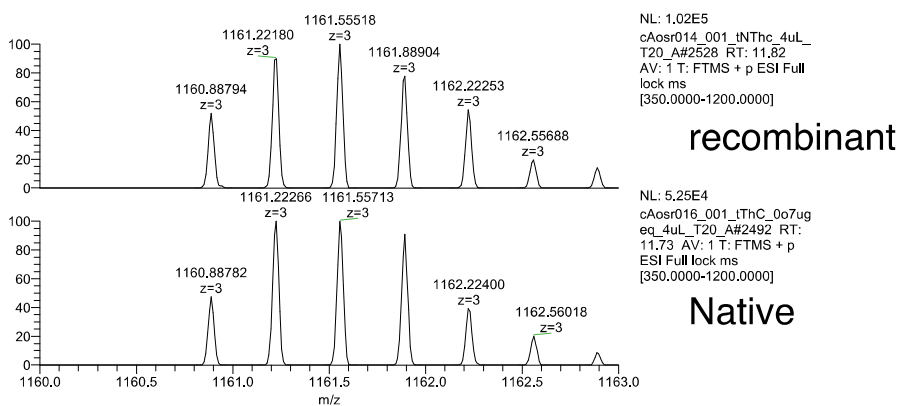

# TVELSPQATPGILQTESSRVDNGRL (res 73-97)

RT: 0.00 - 20.00

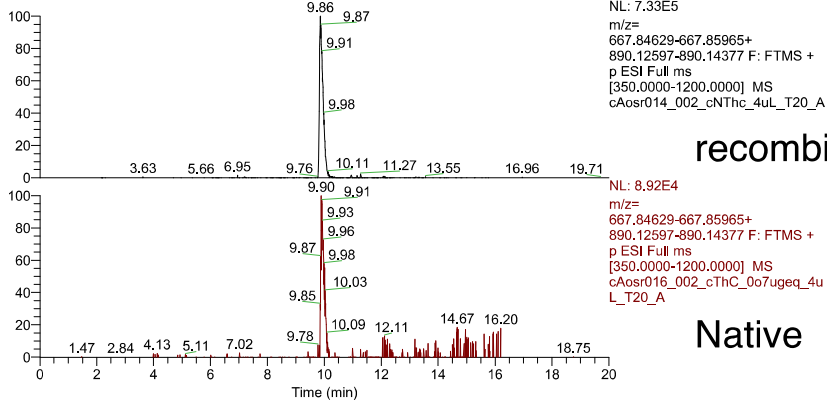

charge 4 (theoretical m/z=667.85297)

recombinant m/z=667.85278, RT=9.83,  $\Delta$ ppm=-0.33 (PD)

Native

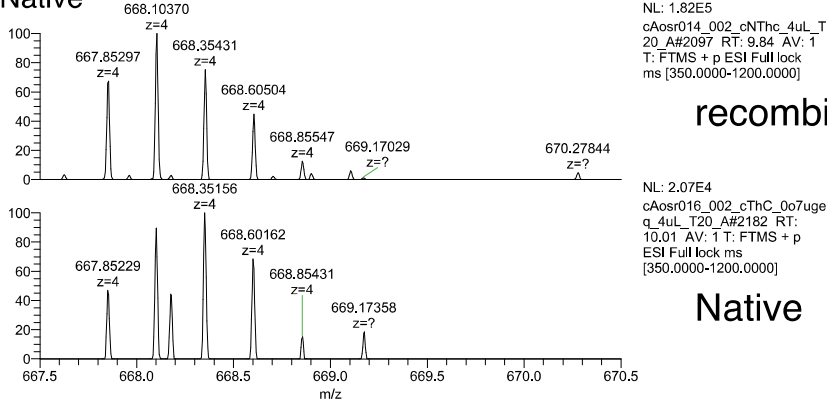

charge 3 (theoretical m/z=890.13487)

recombinant

Native m/z=890.13531, RT=9.89,  $\Delta$ ppm=0.46 (PD)

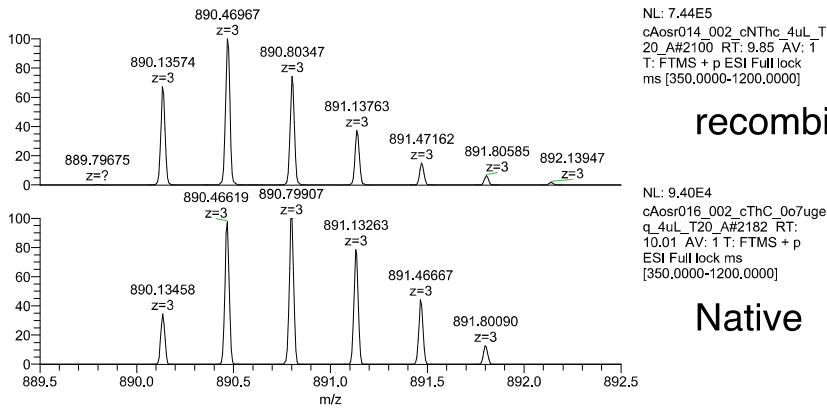

# ATPGILQTESSRVDNGRLIW (res 80-99)

RT: 0.00 - 20.00

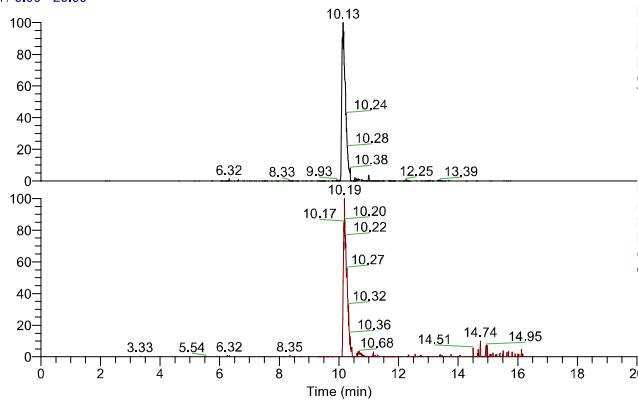

NL: 6.95E5  
 m/z= 738.38657-738.40133  
 F: FTMS + p ESI Full ms  
 [350.0000-1200.0000] MS  
 cAosr014\_002\_cNThc\_4uL\_  
 T20\_A

recombinant

NL: 3.10E5  
 m/z= 738.38657-738.40133  
 F: FTMS + p ESI Full ms  
 [350.0000-1200.0000] MS  
 cAosr016\_002\_cThC\_0o7ug  
 eq\_4uL\_T20\_A

Native

charge 3 (theoretical m/z=738.39395)

recombinant m/z=738.39441, RT=10.09, Δppm=0.57 (PD)

Native m/z=738.39429, RT=10.14, Δppm=0.41 (PD)

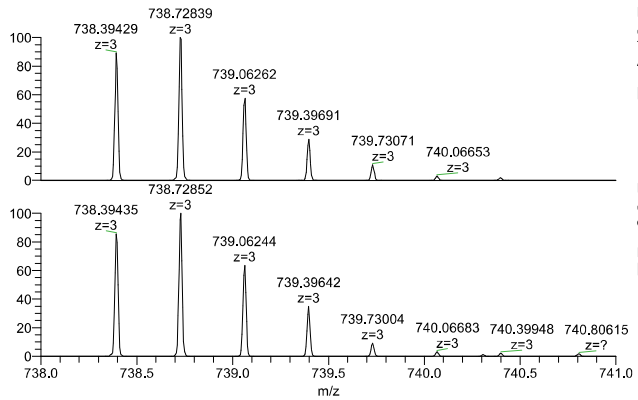

NL: 6.66E5  
 cAosr014\_002\_cNThc\_4uL\_  
 T20\_A#2158 RT: 10.13  
 AV: 1 T: FTMS + p ESI Full  
 lock ms  
 [350.0000-1200.0000]

recombinant

NL: 2.87E5  
 cAosr016\_002\_cThC\_0o7ug  
 eq\_4uL\_T20\_A#2219 RT:  
 10.18 AV: 1 T: FTMS + p  
 ESI Full lock ms  
 [350.0000-1200.0000]

Native

# LIWQNYAFGANDGGcIVGDR (res 97-116)

RT: 0.00 - 20.00

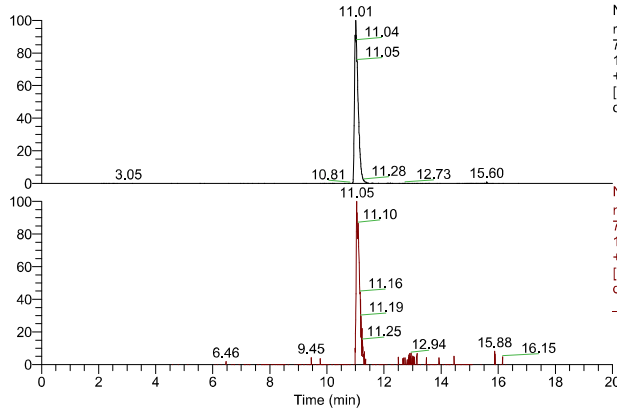

NL: 2.85E6  
 m/z=  
 742.67731-742.69217+  
 1113.51233-1113.53461 F: FTMS  
 + p ESI Full ms  
 [350.0000-1200.0000] MS  
 cAosr014\_001\_tNThc\_4uL\_T20\_A

recombinant

NL: 7.83E4  
 m/z=  
 742.67731-742.69217+  
 1113.51233-1113.53461 F: FTMS  
 + p ESI Full ms  
 [350.0000-1200.0000] MS  
 cAosr016\_001\_tThC\_0o7ugeq\_4uL\_T20\_A

Native

charge 3 (theoretical m/z=742.68474)

recombinant

Native m/z=742.68451, RT=11.06,  $\Delta$ ppm=-0.36 (PD)

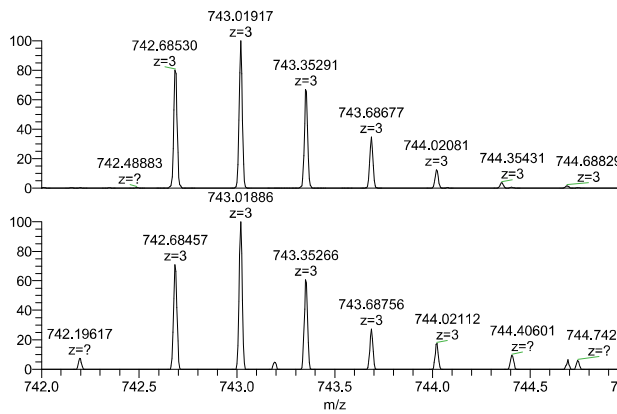

NL: 2.17E6  
 cAosr014\_001\_tNThc\_4uL\_T20\_A#2348 RT: 10.98 AV: 1 T: FTMS + p ESI Full lock ms [350.0000-1200.0000]

recombinant

NL: 6.80E4  
 cAosr016\_001\_tThC\_0o7ugeq\_4uL\_T20\_A#2363 RT: 11.11 AV: 1 T: FTMS + p ESI Full lock ms [350.0000-1200.0000]

Native

charge 2 (theoretical 1113.52347)

recombinant m/z=1113.52417, RT=10.96,  $\Delta$ ppm=0.58 (PD)

Native

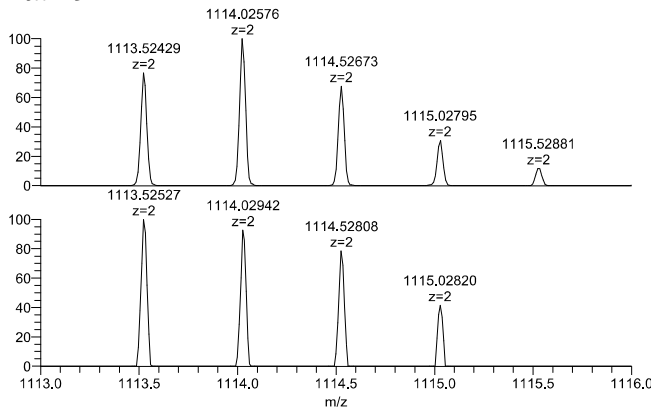

NL: 5.33E5  
 cAosr014\_001\_tNThc\_4uL\_T20\_A#2353 RT: 11.00 AV: 1 T: FTMS + p ESI Full lock ms [350.0000-1200.0000]

recombinant

NL: 9.79E3  
 cAosr016\_001\_tThC\_0o7ugeq\_4uL\_T20\_A#2347 RT: 11.03 AV: 1 T: FTMS + p ESI Full lock ms [350.0000-1200.0000]

Native

# GANDGGcIVGDRDFNDVF (res 105-122)

RT: 0.00 - 20.00

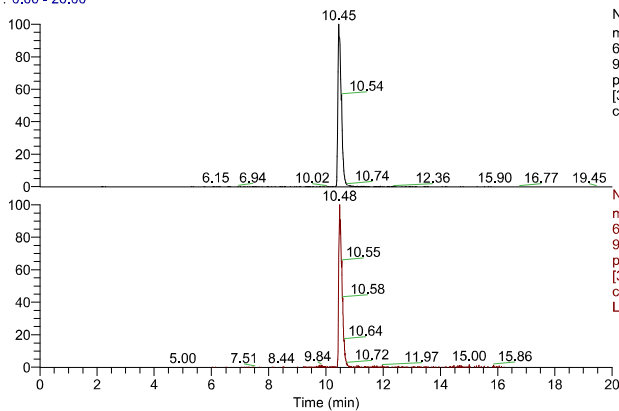

NL: 7.42E6  
 m/z=  
 643.27306-643.28592+  
 964.40596-964.42524 F: FTMS +  
 p ESI Full ms  
 [350.0000-1200.0000] MS  
 cAosr014\_002\_cNThc\_4uL\_T20\_A

recombinant

NL: 1.11E6  
 m/z=  
 643.27306-643.28592+  
 964.40596-964.42524 F: FTMS +  
 p ESI Full ms  
 [350.0000-1200.0000] MS  
 cAosr016\_002\_cThC\_0o7ugeq\_4u  
 L\_T20\_A

Native

charge 2 (theoretical m/z=964.41560)

recombinant m/z=964.41559, RT=10.41,  $\Delta$ ppm=-0.06 (PD)

Native m/z=964.41583, RT=10.43,  $\Delta$ ppm=0.19 (PD)

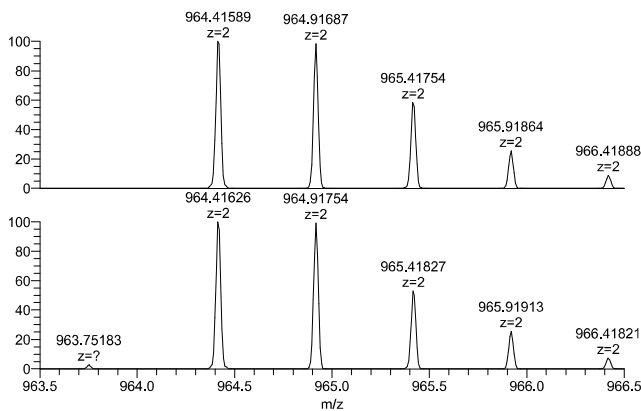

NL: 4.41E6  
 cAosr014\_002\_cNThc\_4uL\_T  
 20\_A#2223 RT: 10.45 AV:  
 1 T: FTMS + p ESI Full lock  
 ms [350.0000-1200.0000]

recombinant

NL: 4.56E5  
 cAosr016\_002\_cThC\_0o7uge  
 q\_4uL\_T20\_A#2290 RT:  
 10.54 AV: 1 T: FTMS + p  
 ESI Full lock ms  
 [350.0000-1200.0000]

Native

# DFNDVFLITGLVR (res 117-130)

RT: 0.00 - 20.00

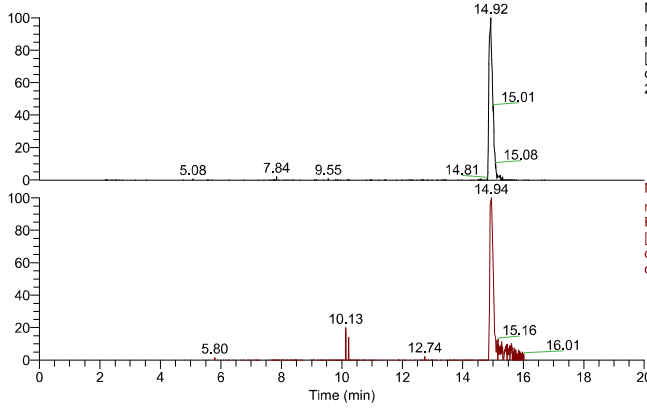

NL: 2.95E5  
 m/z= 804.43839-804.44805  
 F: FTMS + p ESI Full ms  
 [350.0000-1200.0000] MS  
 cAosr014\_001\_tThC\_4uL\_T  
 20\_A

recombinant

NL: 1.11E5  
 m/z= 804.43839-804.44805  
 F: FTMS + p ESI Full ms  
 [350.0000-1200.0000] MS  
 cAosr016\_001\_tThC\_0o7uge  
 q\_4uL\_T20\_A

Native

charge 2 (theoretical m/z=804.44322)

recombinant m/z=804.44360, RT=14.85, Δppm=0.42 (PD)

Native m/z=804.44287, RT=14.94, Δppm=-0.49 (PD)

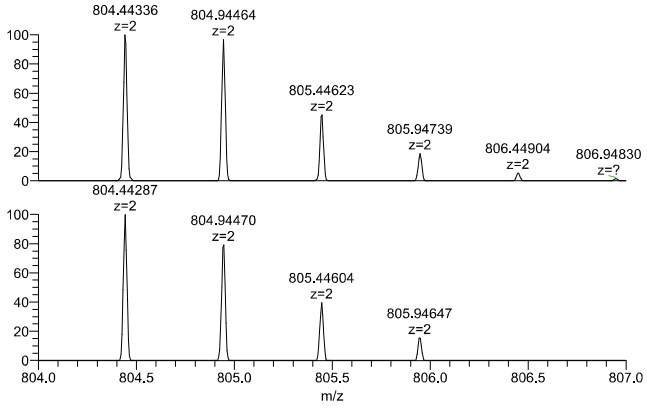

NL: 2.55E5  
 cAosr014\_001\_tThC\_4uL\_  
 T20\_A#3160 RT: 14.89  
 AV: 1 T: FTMS + p ESI Full  
 lock ms  
 [350.0000-1200.0000]

recombinant

NL: 1.06E5  
 cAosr016\_001\_tThC\_0o7ug  
 eq\_4uL\_T20\_A#3134 RT:  
 14.90 AV: 1 T: FTMS + p  
 ESI Full lock ms  
 [350.0000-1200.0000]

Native

## VLITGLVRG (res 123-131)

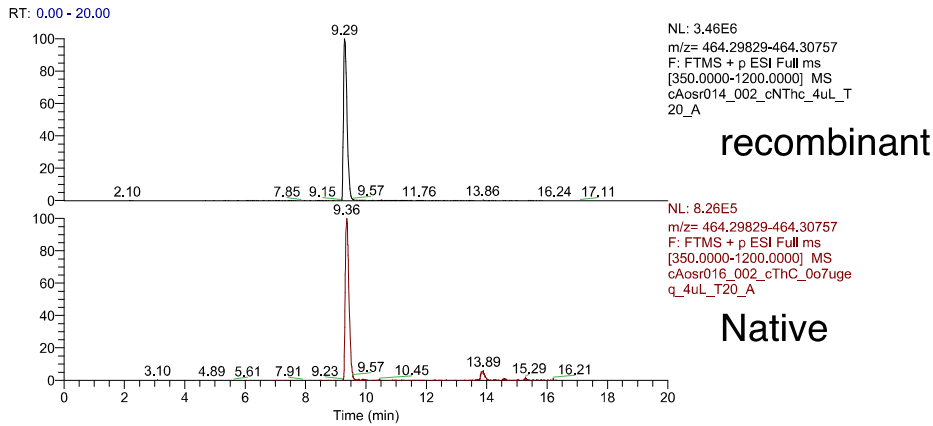

charge 2 (theoretical m/z=464.30293)  
 recombinant  
 Native m/z=464.40289, RT=9.30,  $\Delta$ ppm=-0.14 (PD)

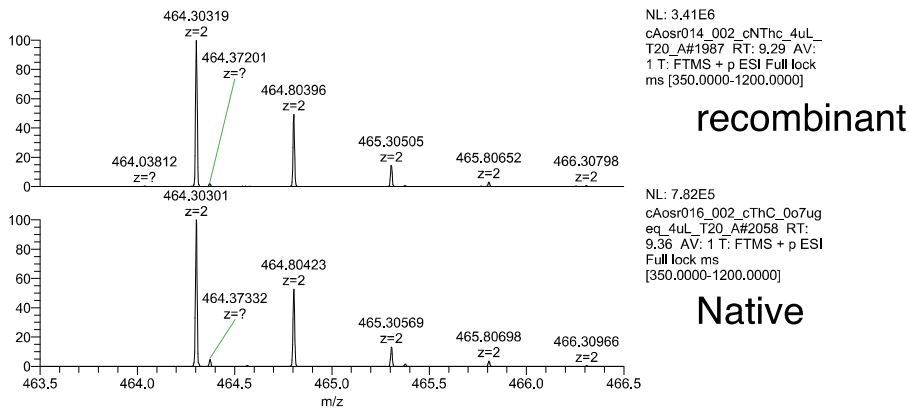

## Supplementary Figure 6. Sequence determination of ThC continued

Mass spectrometry confirmation of the identified peptides of nThC compared with rThC. Extracted ion chromatograms (XICs) of the identified peptides of rThC and nThC were shown as black and red, respectively. MS spectra of the charged peptide ion from rThC (upper) and nThC (bottom) at the XIC peak are shown, respectively. RT, retention time; PD, the peptide identified by Proteome Discoverer 1.4.0.288 (Thermo Scientific); PEAKS, the peptide identified by PEAKS studio 10.0 Build 20190129 (Bioinformatics Solutions);  $\Delta$ ppm, parts per million of the mass differences between observed and theoretical m/z values. The m/z, RT, and  $\Delta$ ppm of the peptide identified by PD or PEAKS were indicated. Carbamidomethyl-Cys residue was shown as lower case.

## recombinant ThC

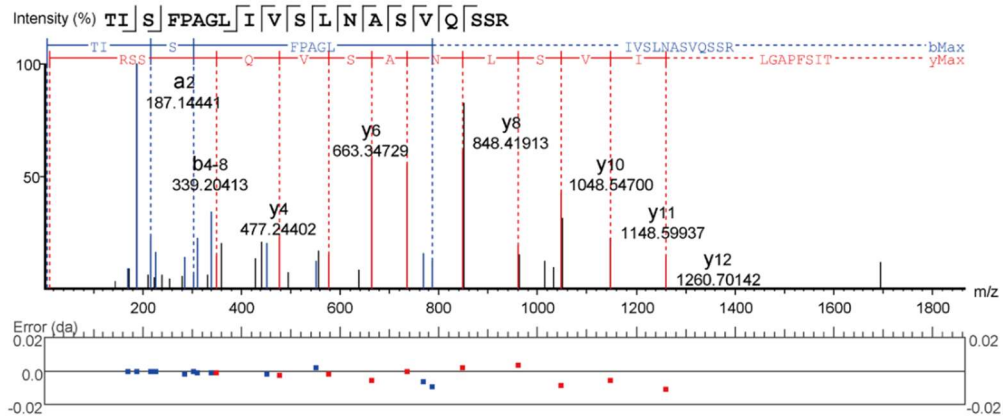

## native ThC

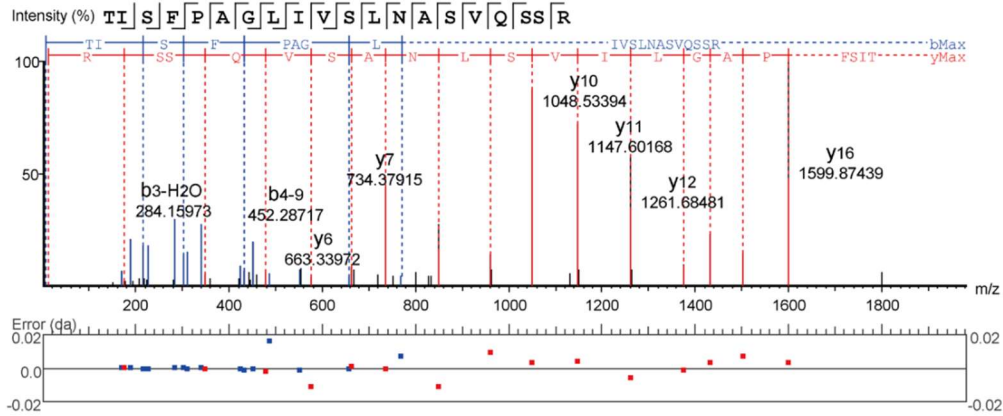

## Supplementary Figure 7. Sequence determination of ThC continued

Annotated MS/MS fragmentation spectra for a putative N-terminal 9-28 residues, TISFPAGLIVSLNASVQSSR, derived from rThC (upper panel) and nThC (lower panel). MS/MS spectra were deconvoluted into singly charged ions from the observed spectra and theoretical  $m/z$  values for fragment ions were assigned for each peak. The identified matches for the N-terminal-containing ions are shown in blue and those for the C-terminal-containing ions in red. The  $m/z$  differences between theoretical and observed values for all assigned peaks were displayed in error map and were less than 0.02 Da. The MS/MS spectra confirmed that 25<sup>th</sup> residue was clearly assigned as Q. The exact masses and precursor isotope distribution of MS1 spectrum for the peptides derived from nThC and rThC (1-28 residues, 25Q) was also identical (Supplementary Figure 6), in line with above sequence analyses confirming that 25<sup>th</sup> residue the N terminal sequence is Q, not E.

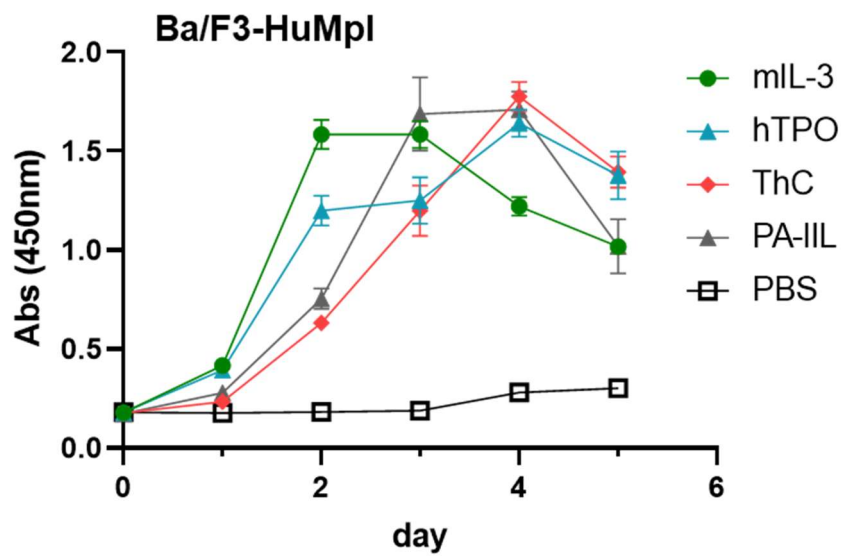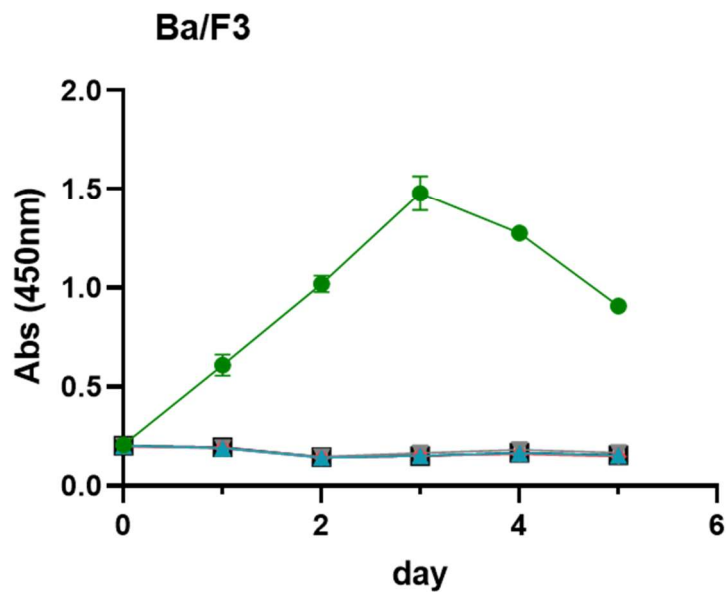

**Supplementary Figure 8. Cell proliferation assay for Ba/F3 and Ba/F3-HuMpl cells in the presence or absence of ligand**

Cell proliferation assay of Ba/F3 and Ba/F3-HuMpl cells in the absence or presence of the indicated ligand. murineIL-3 (10 ng/mL), humanTPO (10 ng/mL), ThC (0.5  $\mu$ g/mL), PA-IIL (30  $\mu$ g/mL).  $n=5$  per data point. bars indicate mean  $\pm$  SD.

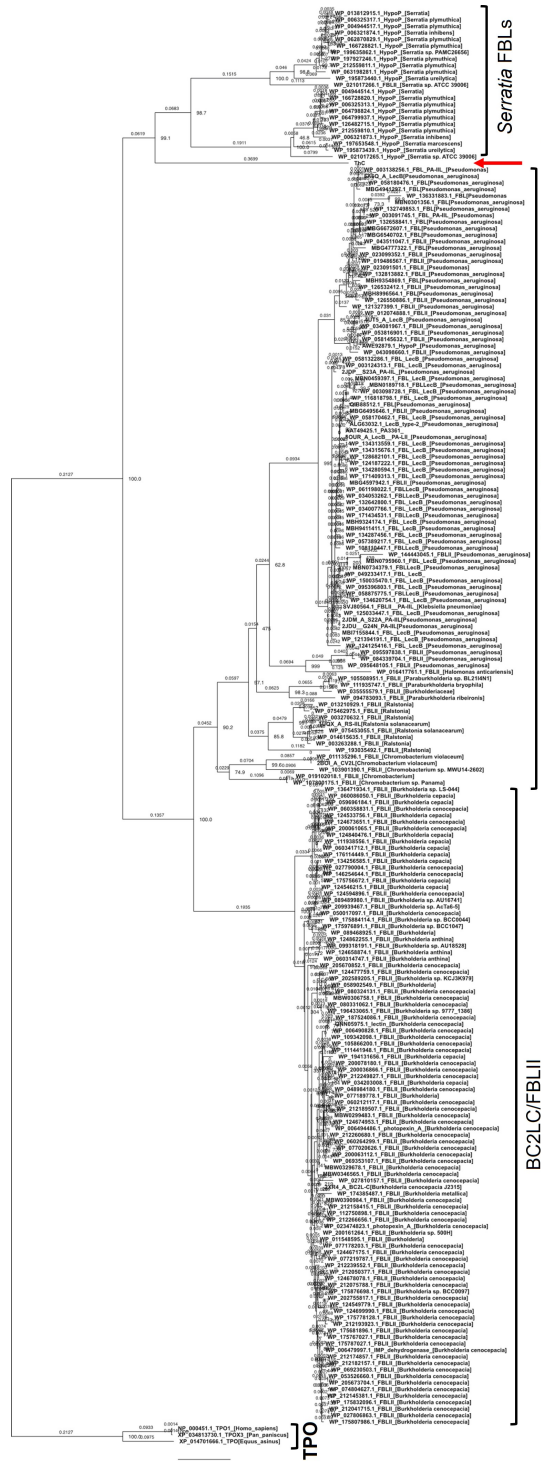

**Supplementary Figure 9. Phylogenetic tree of ThC and putative bacterial fucose binding lectins and TPO**

Bootstrap probabilities of 1,000 replications are shown at each node. A scale bar indicates the genetic distance represented by the horizontal branches.

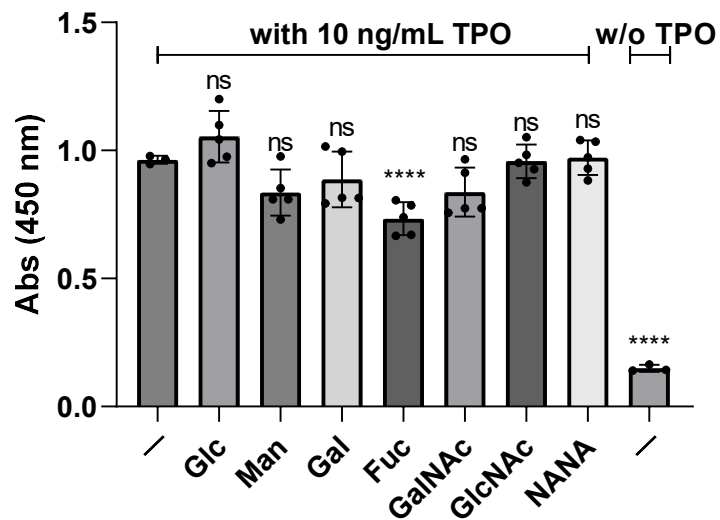

**Supplementary Figure 10. Relative cell growth by TPO in the presence of various sugars in Ba/F3-HuMpl cells**

Positive control contains TPO (10 ng/mL) and negative control without agonist. Each 10 mM of sugar was present.  $n=5$  per data point except positive and negative controls where  $n=3$ . bars indicate mean  $\pm$  SD. One-way ANOVA followed by a Dunnett's test for multiple group comparison, \*\*\*\* $P < 0.001$  vs. positive control, ns, not significant.

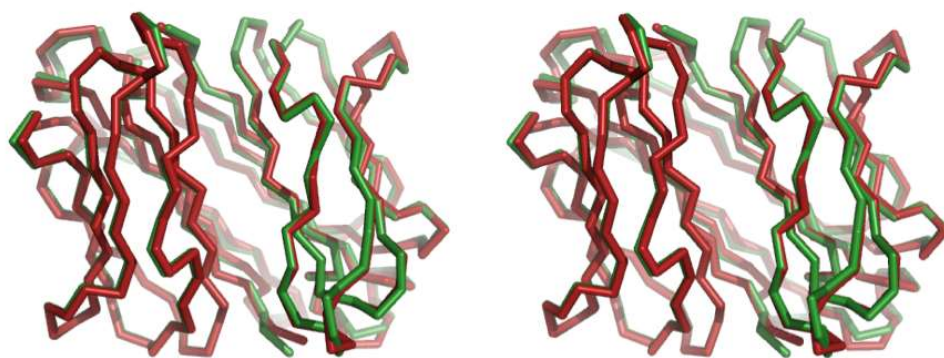

**Supplementary Figure 11. Stereo representation of superposition of nThC (green) and rThC (red)**

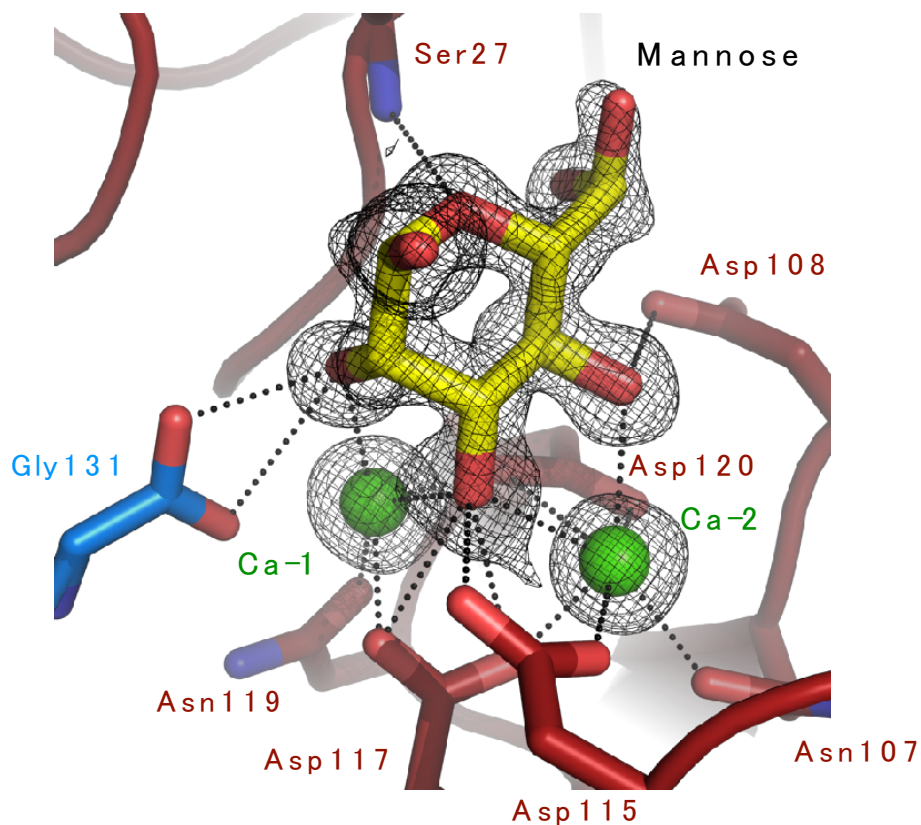

**Supplementary Figure 12. Close-up view of carbohydrate binding site in complex with rThC and D-mannose**

Fo-Fc map of the carbohydrates and  $\text{Ca}^{2+}$  ions contoured at  $3.0 \sigma$  are shown. Individual protomers are shown red and blue, respectively.

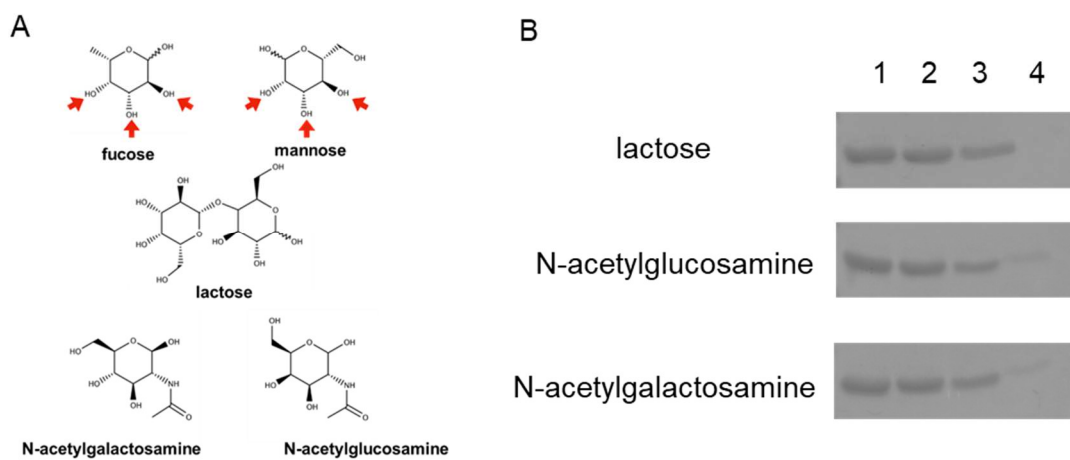

**Supplementary Figure 13. Affinity of rThC against carbohydrate-immobilized agarose gel**

Chemical structure of the carbohydrates tested (A) and their binding with rThC (B). (A) fucose, mannose, lactose, N-acetylgalactosamine, and N-acetylglucosamine. Red arrows indicate hydroxyl groups which are recognized by rThC and  $\text{Ca}^{2+}$  ions. (B) Binding of rThC to the lactose, N-acetylglucosamine-, and N-acetylgalactosamine-immobilizing resin in the presence of 5 mM  $\text{CaCl}_2$ . Lane 1: rThC standard, 2: flow through fraction, 3: wash fraction, 4: rThC bound on the resin. Experiments in B were performed in triplicates. Uncropped gel images are provided as a Source Data file.

in the presence of 5 mM CaCl<sub>2</sub>

in the absence of 5 mM CaCl<sub>2</sub>

rThC vs Fucose

rThC vs Mannose

rThC vs Fucose

rThC vs Mannose

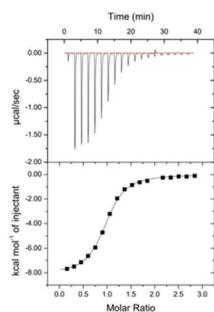

$K_D = 4.72 \mu\text{M}$

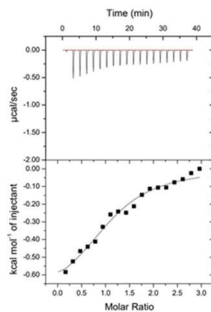

$K_D = 66.2 \mu\text{M}$

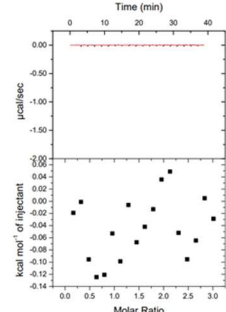

Not bound

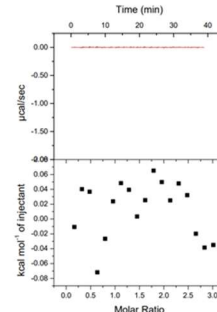

Not bound

in the presence of 5 mM CaCl<sub>2</sub>

Q25K vs Fucose

G132 vs Fucose

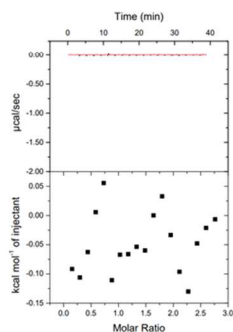

Not bound

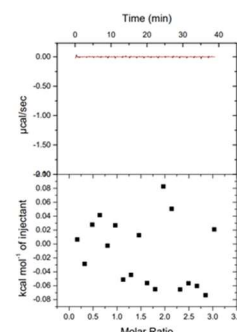

Not bound

### Supplementary Figure 14. Results of ITC for rThC and mutants

rThC (top) and mutants (bottom).  $K_D$  values are shown at the bottom.

Thermodynamic parameters are shown in Supplementary Table S1.

Experimental condition, buffer: 20 mM HEPES-NaOH (pH 8.0), 200 mM NaCl, temperature: 25 °C, injection: 18 times of 2 µL with 120 s interval.

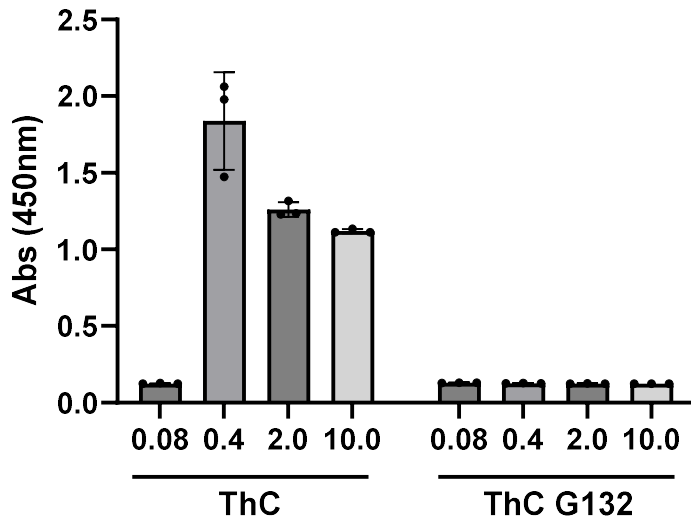

**Supplementary Figure 15. Effect of rThC G132 on cell proliferation of Ba/F3-HuMpl cells**

Cells were cultured with indicate concentration (μg/mL) ThC for 4 days.  $n=3$  per data point. bars indicate mean  $\pm$  SD.

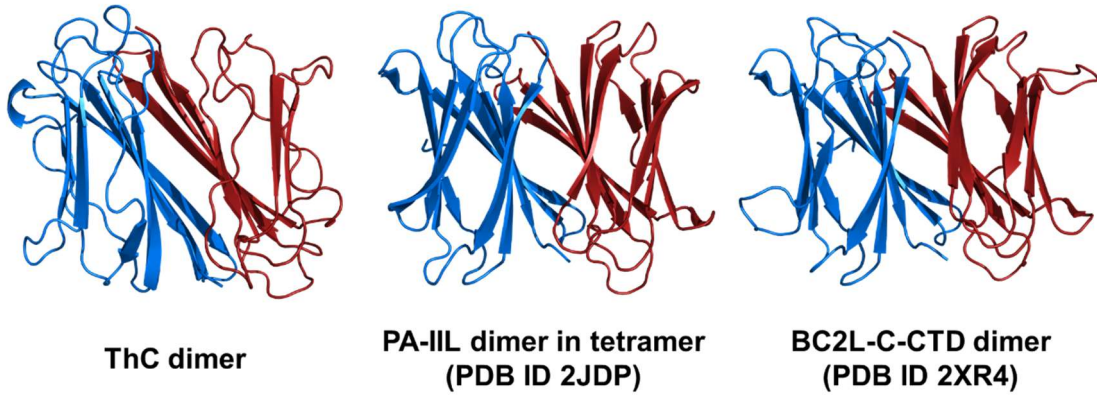

**Supplementary Figure 16. Structural comparison between ThC dimer, PA-IIL dimer (PDB ID 2JDP), and BC2L-C-CTD dimer (PDB ID 2XR4)**

in the presence of 5 mM CaCl<sub>2</sub>

BC2LC-CTD vs Fucose      BC2LC-CTD vs Mannose

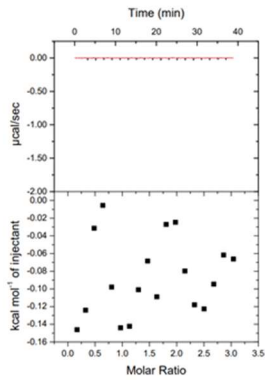

Not bound

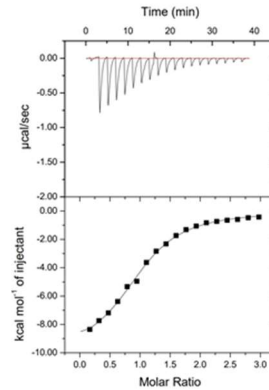

K<sub>D</sub> = 66.2 µM

in the presence of 5 mM CaCl<sub>2</sub>

PAII vs Fucose

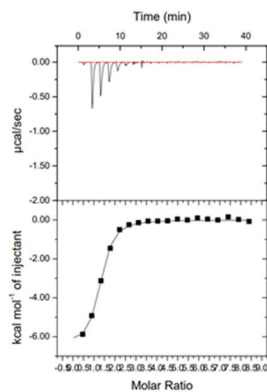

K<sub>D</sub> = 2.78 µM

PAII vs Mannose

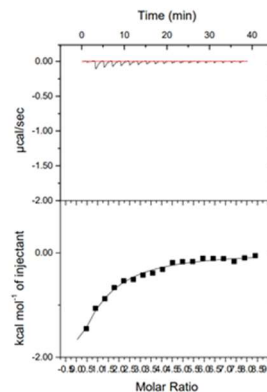

K<sub>D</sub> = 78.7 µM

**Supplementary Figure 17. Results of ITC of BC2LC-CTD (top) and PA-IIL (bottom)**

K<sub>D</sub> values are shown at the bottom. Thermodynamic parameters are shown in Supplementary Table 1. Experimental condition, buffer: 20 mM HEPES-NaOH (pH 8.0), 200 mM NaCl, temperature: 25 °C, injection: 18 times of 2 µL with 120 s interval.

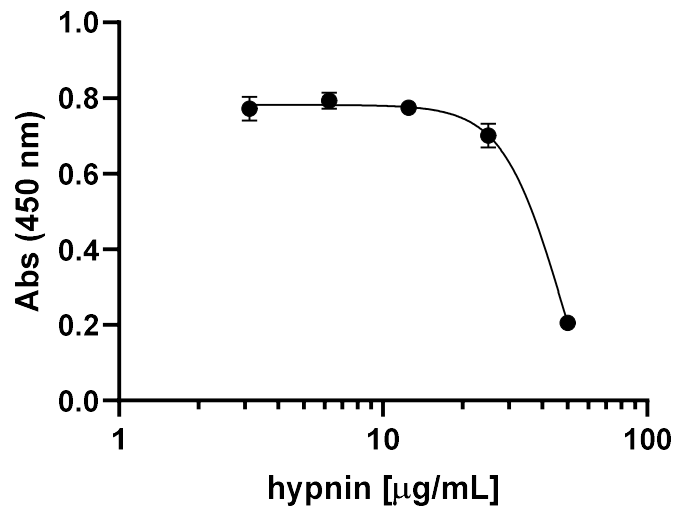

**Supplementary Figure 18. Effect of hypnin on Ba/F3 cell proliferation**

Cells were cultured with 10 ng/mL mL-3 for 4 days.  $IC_{50} > 47 \mu\text{g/mL}$ .  $n=5$  per data point. bars indicate mean  $\pm$  SD.

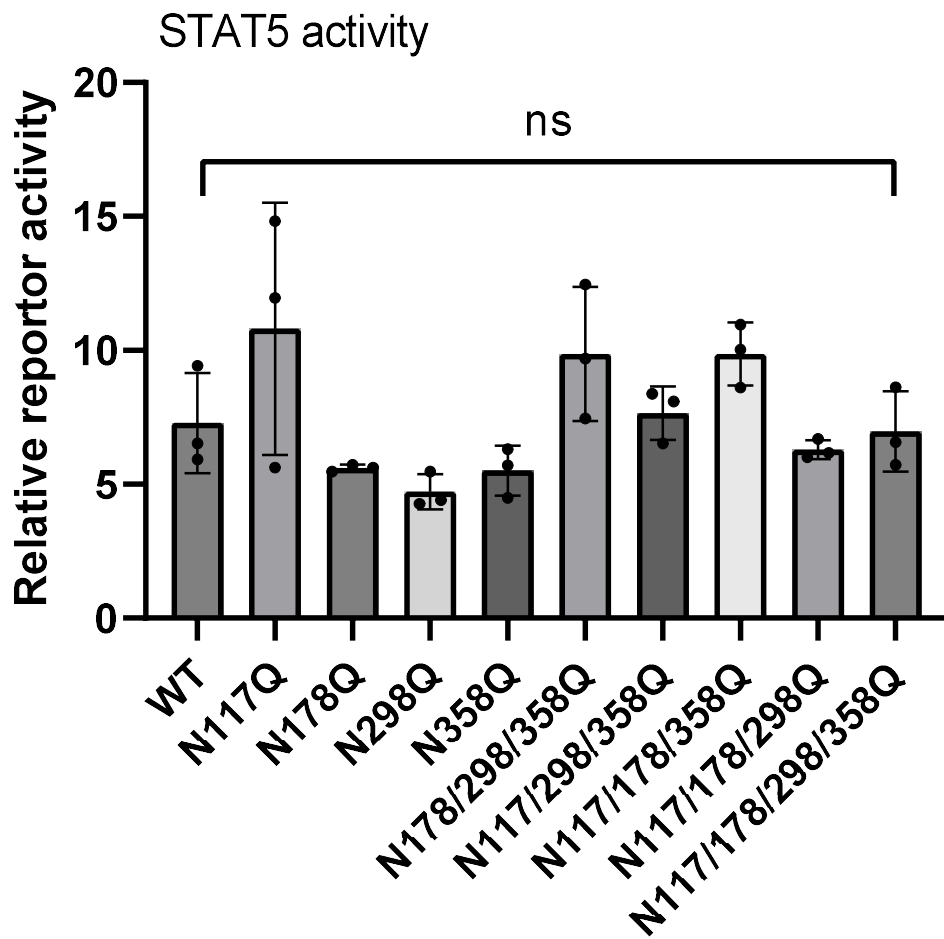

**Supplementary Figure 19. Comparable STAT5 activation by TPO with MPL bearing N/Q mutation**

STAT5 reporter activity in HEK293T cells expressing a series of N/Q mutant constructs when stimulated by TPO (10 ng/mL). ns = no significance.  $n=3$  per data point. bars indicate mean  $\pm$  SD. One-way ANOVA followed by a Dunnett's test for multiple group comparison, ns: not significant

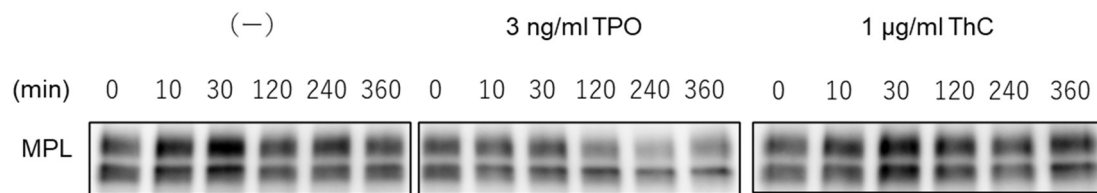

**Supplementary Figure 20. Western Blot data for Fig 5B.**

0, 10, 30, 120, 240 and 360 min after the addition of ThC (1 µg/mL), TPO (3 ng/mL), control (-, No agonist). Levels of cell surface MPL was determined and depicted. Three independent experiments were carried out. Source data are provided as a Source Data file.

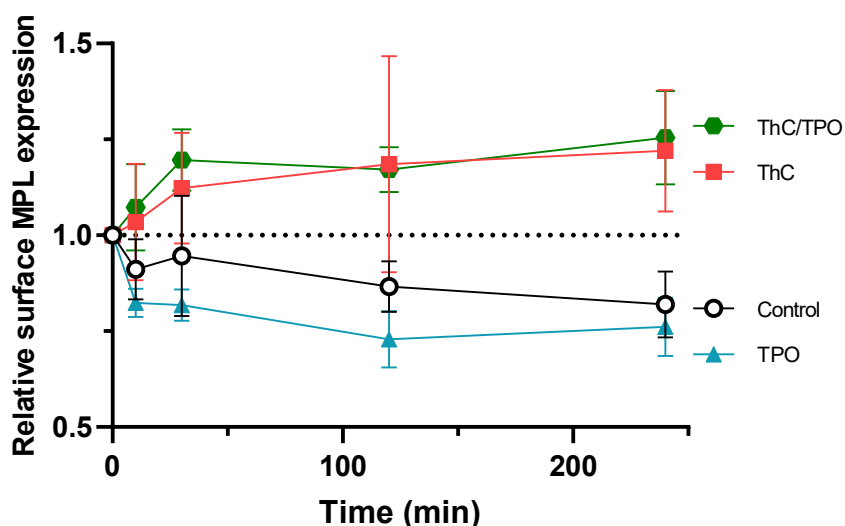

**Supplementary Figure 21. Interference of the TPO-dependent internalization of MPL from cell surface by ThC**

0, 10, 30, 120 and 240min after the addition of ThC (0.1 µg/mL), ThC/TPO (0.1 µg/mL and 0.2 ng/mL, respectively), TPO (0.2 ng/mL) and control (No agonist), levels of cell surface MPL was determined and depicted. *N*=3 per data point. Bars indicate mean ± SD.

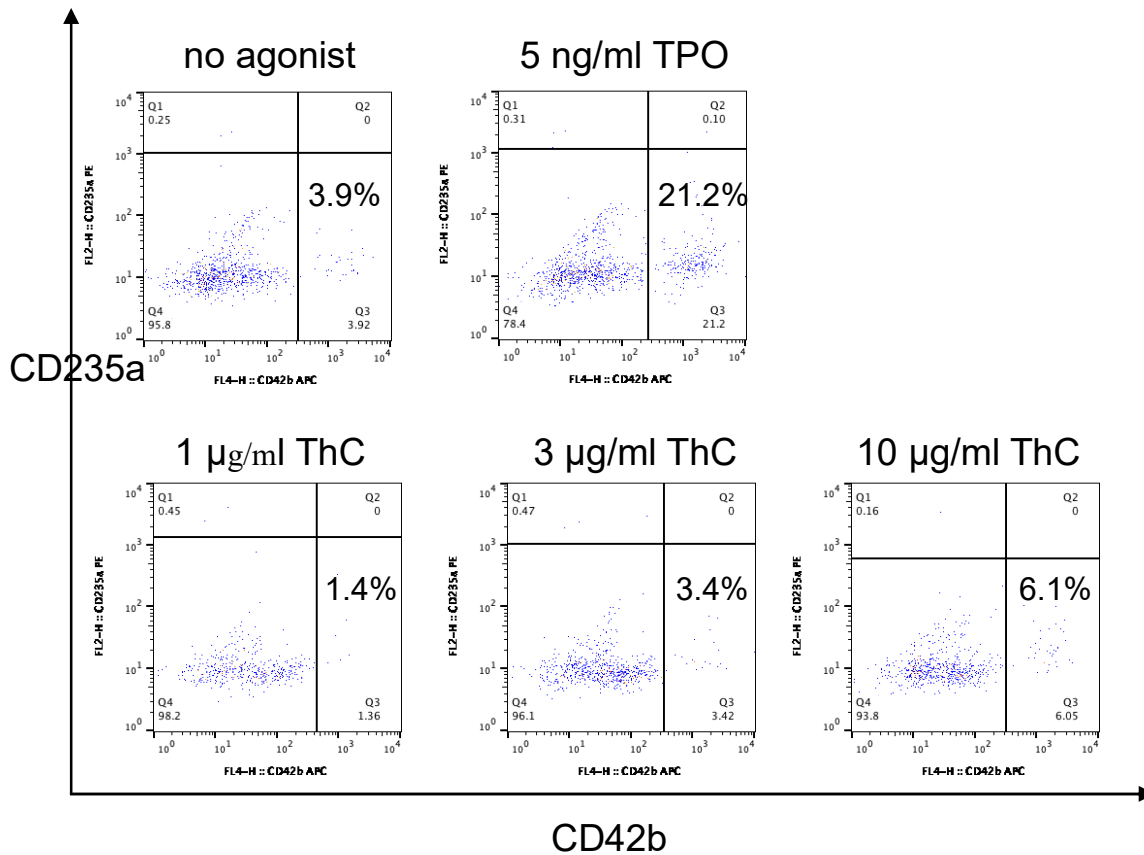

**Supplementary Figure 22. Limited effect of ThC on the induction of megakaryocytic cells in iPS-derived hematopoietic stem/progenitor cells**

Hematopoietic stem/progenitor cells (HPSCs) induced from iPS cells<sup>4</sup> were cultured in Iscove-modified Dulbecco media (Thermo Fisher #12440-053) supplemented with 15% FBS (Biowest #S1530), 1 x penicillin-streptomycin-glutamine (Thermo Fisher #10378-016), 1 x Insulin-Transferrin-Selenium (Thermo Fisher #41400-045), 0.45 mM 1-thioglycerol (Sigma #M6145), and 50 µg/mL ascorbic acid (Sigma #A4544) in the presence or absence of indicated agonist. 7 days after the differentiation, cells were collected, stained with anti-human CD42b-APC (BD Bioscience #551061) and anti-human CD235a-PE (BD Bioscience #555570), and analyzed by FACSCalibur (BD Biosciences). Flow cytometric plots showed limited effect of ThC on the induction of megakaryocytic cells defined by the expression of CD42b. While thrombopoietin (TPO), the natural ligand for MPL, induced megakaryocytic differentiation. Experiments were performed three times and obtained reproducible results.

## Supplementary References

- 1 Sherman, W., Day, T., Jacobson, M. P., Friesner, R. A. & Farid, R. Novel procedure for modeling ligand/receptor induced fit effects. *Journal of medicinal chemistry* **49**, 534-553 (2006).
- 2 Pokorná, M. *et al.* Unusual entropy-driven affinity of *Chromobacterium violaceum* lectin CV-III toward fucose and mannose. *Biochemistry* **45**, 7501-7510 (2006).
- 3 Sabin, C. *et al.* Binding of different monosaccharides by lectin PA-III from *Pseudomonas aeruginosa*: thermodynamics data correlated with X-ray structures. *FEBS Lett.* **580**, 982-987 (2006).
- 4 Takei, H. *et al.* Skewed megakaryopoiesis in human induced pluripotent stem cell-derived haematopoietic progenitor cells harbouring calreticulin mutations. *Br. J. Haematol.* **181**, 791-802 (2018).
